# Supplementary material
Source: publisher figshare collection journal article supplement (https://karger.figshare.com/ndownloader/files/21204663)
Supplement: Supplementary file 1 [file 21204663]

(SUMMARY))

| **Search period:2010-01-01~2019-05-22** | | |  |  |  |  |  |
| --- | --- | --- | --- | --- | --- | --- | --- |
|  |  |  |  |  |  |  |  |
| **Visiting Date△** | **Name** | **Resident registration number** | **Prescription issuing agency** | **one dose** | **Number of doses** | **Medication days** | **Consumption** |
| **2010-08-18 18:00:05** | ****** Cho** | **331209-2******** | **Korea Association of Health Promotion' Clinic** | **2.00000** | **1** |  |  |
| 2010-09-17 14:52:17 | **** Cho | 331209-2****** | Korea Association of Health Promotion' Clinic | 3.00000 | 1 |  |  |
| 2010-10-19 11:04:18 | **** Cho | 331209-2****** | Korea Association of Health Promotion' Clinic | 2.00000 | 3 |  |  |
| 2010-11-15 12:35:18 | **** Cho | 331209-2****** | Korea Association of Health Promotion' Clinic | 2.00000 | 3 |  |  |
| 2010-12-17 15:23:29 | **** Cho | 331209-2****** | Korea Association of Health Promotion' Clinic | 3.00000 | 1 |  |  |
| 2010-12-27 18:07:01 | *****-**** Koh | 320420-1****** | Korea Association of Health Promotion' Clinic | 4.00000 | 1 |  |  |
| 2011-01-18 17:37:12 | **** Cho | 331209-2****** | Korea Association of Health Promotion' Clinic | 3.00000 | 1 |  |  |
| 2011-02-21 18:45:05 | *****-**** Koh | 320420-1****** | Korea Association of Health Promotion' Clinic | 4.00000 | 1 |  |  |
| 2011-02-21 18:47:52 | **** Cho | 331209-2****** | Korea Association of Health Promotion' Clinic | 4.00000 | 1 |  |  |
| 2011-03-15 18:01:46 | *****-**** Koh | 320420-1****** | Korea Association of Health Promotion' Clinic | 4.00000 | 1 |  |  |
| 2011-03-15 18:03:59 | **** Cho | 331209-2****** | Korea Association of Health Promotion' Clinic | 4.00000 | 1 |  |  |
| 2011-04-13 11:41:06 | *****-*** Shin | 400415-1****** | Maronie Clinic | 1.00000 | 1 |  |  |
| 2011-04-14 17:56:20 | *****-**** Koh | 320420-1****** | Korea Association of Health Promotion' Clinic | 4.00000 | 1 |  |  |
| 2011-04-14 17:59:22 | **** Cho | 331209-2****** | Korea Association of Health Promotion' Clinic | 4.00000 | 1 |  |  |
| 2011-05-19 11:36:37 | *****-**** Koh | 320420-1****** | Korea Association of Health Promotion' Clinic | 4.00000 | 1 |  |  |
| 2011-05-19 11:47:19 | **** Cho | 331209-2****** | Korea Association of Health Promotion' Clinic | 4.00000 | 1 |  |  |
| 2011-07-06 18:15:49 | *****-**** Koh | 320420-1****** | Korea Association of Health Promotion' Clinic | 4.00000 | 1 |  |  |
| 2011-07-06 18:16:45 | **** Cho | 331209-2****** | Korea Association of Health Promotion' Clinic | 4.00000 | 1 |  |  |
| 2011-08-04 17:36:40 | **** Cho | 331209-2****** | Korea Association of Health Promotion' Clinic | 4.00000 | 1 |  |  |
| 2011-09-02 18:02:18 | **** Cho | 331209-2****** | Korea Association of Health Promotion' Clinic | 4.00000 | 1 |  |  |
| 2011-09-30 19:44:04 | **** Cho | 331209-2****** | Korea Association of Health Promotion' Clinic | 4.00000 | 1 |  |  |
| 2011-11-04 09:37:02 | **** Cho | 331209-2****** | Korea Association of Health Promotion' Clinic | 4.00000 | 1 |  |  |
| 2011-12-08 13:50:17 | **** Cho | 331209-2****** | Korea Association of Health Promotion' Clinic | 4.00000 | 1 |  |  |
| 2012-02-17 17:59:39 | **** Cho | 331209-2****** | Korea Association of Health Promotion' Clinic | 4.00000 | 1 |  |  |
| 2012-04-09 18:12:42 | **** Cho | 331209-2****** | Korea Association of Health Promotion' Clinic | 4.00000 | 1 |  |  |
| 2012-08-14 18:09:32 | **** Cho | 331209-2****** | Korea Association of Health Promotion' Clinic | 4.00000 | 1 |  |  |
| 2012-09-24 19:32:00 | **** Cho | 331209-2****** | Korea Association of Health Promotion' Clinic | 4.00000 | 1 |  |  |

| 2012-11-02 17:22:46 | **** Cho | 331209-2****** | Korea Association of Health Promotion' Clinic | 1.00000 | 1 |  |  |
| --- | --- | --- | --- | --- | --- | --- | --- |
| 2013-01-18 19:46:07 | **** Cho | 331209-2****** | Korea Association of Health Promotion' Clinic | 1.00000 | 1 |  |  |
| 2013-04-13 13:10:20 | **** Cho | 331209-2****** | Korea Association of Health Promotion' Clinic | 1.00000 | 1 |  |  |
| 2013-07-19 20:51:30 | **** Cho | 331209-2****** | Korea Association of Health Promotion' Clinic | 1.00000 | 1 |  |  |
| 2013-12-21 11:30:19 | **** Cho | 331209-2****** | Korea Association of Health Promotion' Clinic | 1.00000 | 1 |  |  |
| 2014-03-20 18:25:23 | **** Cho | 331209-2****** | Korea Association of Health Promotion' Clinic | 1.00000 | 1 |  |  |
| 2014-11-15 16:39:15 | **** Cho | 331209-2****** | Korea Association of Health Promotion' Clinic | 1.00000 | 1 |  |  |
| 2015-03-02 19:37:23 | **** Cho | 331209-2****** | Korea Association of Health Promotion' Clinic | 1.00000 | 1 |  |  |

| **doc 1-1**  **Recording records by period_*****-**** Koh_2010-12-27** | | |  |  |  |
| --- | --- | --- | --- | --- | --- |
|  |  |  |  |  |  |
|  |  |  |  |  | **Visiting Date : [2010-12-27 PM 6:07:01]** |
| **Name** | *****-**** Koh(*/**) |  | **Health insurance subscriber** | *****-**** Koh |  |
| **Resident registration number** | 320420-1****** |  | **Phone number** |  |  |
| **Adress** |  |  |  |  |  |
| **Combination code / Certificate number / Combination name** | |  |  |  | / |
|  |  |  |  |  |  |
| **Grant Number** |  |  | **Doctor** | Eunhee Hong(48110) | |
| **Prescription issuing agency** | Korea Association of Health Promotion’ Clinic | | **Phone number** |  |  |
| **Disease number** |  |  | **Specific symbol** |  |  |
|  |  |  |  |  |  |
| **Prescription list** |  |  |  |  |  |
| **Component Code** | **Ingredient Name** |  | **one dose** | **Number of daily doses** | **Number of days to be prepared** |
| 644801980 | Taiguk Dapsone Tablet25mg_(25mg/1 Tablet) |  | 4 | 1 | 60 |
|  |  |  |  |  |  |
| **Pharmacy** | **[Pharmacist:EUNJU LEE]** |  |  |  | **(Number of days to be prepared : 60 days)** |
| **Billing Code** | **Drug name** | **replaced** | **one dose** | **Number of daily doses** | **Number of days to be prepared** |
|  | Taiguk Dapsone Tablet25mg_(25mg/1 Tablet) |  | 4 | 1 | 60 |
|  |  |  |  |  |  |
| **Precautions** |  |  |  |  |  |
| ※ Take once a day | |  |  |  |  |
| [Taiguk Dapsone Tablet25mg] - ●Take at regular time intervals as directed by your doctor. | | | | |  |
| ●If this medicine irritates the stomach, take it with food. | | | |  |  |
| ●Take it with water. | |  |  |  |  |
| ●Even if your symptoms improve, continue taking it for as long as your doctor prescribes. Do not stop taking without your doctor’s instructions. | | | | | |

| **doc 1-2**  **Recording records by period_*****-**** Koh_2011-03-15** | | |  |  |  |
| --- | --- | --- | --- | --- | --- |
|  |  |  |  |  |  |
|  |  |  |  |  | **Visiting Date : [2011-03-15 PM 6:01:46]** |
| **Name** | *****-**** Koh(*/**) |  | **Health insurance subscriber** | *****-**** Koh |  |
| **Resident registration number** | 320420-1****** |  | **Phone number** |  |  |
| **Adress** |  |  |  |  |  |
| **Combination code / Certificate number / Combination name** | |  |  |  | / |
|  |  |  |  |  |  |
| **Grant Number** |  |  | **Doctor** | Eunhee Hong(48110) | |
| **Prescription issuing agency** | Korea Association of Health Promotion’ Clinic | | **Phone number** |  |  |
| **Disease number** |  |  | **Specific symbol** |  |  |
|  |  |  |  |  |  |
| **Prescription list** |  |  |  |  |  |
| **Component Code** | **Ingredient Name** |  | **one dose** | **Number of daily doses** | **Number of days to be prepared** |
| 644801980 | Taiguk Dapsone Tablet25mg_(25mg/1 Tablet) |  | 4 | 1 | 30 |
|  |  |  |  |  |  |
| **Pharmacy** | **[Pharmacist:EUNJU LEE]** |  |  |  | **(Number of days to be prepared : 30 days)** |
| **Billing Code** | **Drug name** | **replaced** | **one dose** | **Number of daily doses** | **Number of days to be prepared** |
|  | Taiguk Dapsone Tablet25mg_(25mg/1 Tablet) |  | 4 | 1 | 30 |
|  |  |  |  |  |  |
| **Precautions** |  |  |  |  |  |
| [Taiguk Dapsone Tablet25mg] - ●Take at regular time intervals as directed by your doctor. | | | | |  |
| ●If this medicine irritates the stomach, take it with food. | | | |  |  |
| ●Take it with water. | |  |  |  |  |
| ●Even if your symptoms improve, continue taking it for as long as your doctor prescribes. Do not stop taking without your doctor’s instructions. | | | | | |

| **doc 1-3**  **Recording records by period_*****-**** Koh_2011-04-14** | | |  |  |  |
| --- | --- | --- | --- | --- | --- |
|  |  |  |  |  |  |
|  |  |  |  |  | **Visiting Date : [2011-04-14 PM 5:56:20]** |
| **Name** | *****-**** Koh(*/**) |  | **Health insurance subscriber** | *****-**** Koh |  |
| **Resident registration number** | 320420-1****** |  | **Phone number** |  |  |
| **Adress** |  |  |  |  |  |
| **Combination code / Certificate number / Combination name** | |  |  |  | / |
|  |  |  |  |  |  |
| **Grant Number** |  |  | **Doctor** | Eunhee Hong(48110) | |
| **Prescription issuing agency** | Korea Association of Health Promotion’ Clinic | | **Phone number** |  |  |
| **Disease number** |  |  | **Specific symbol** |  |  |
|  |  |  |  |  |  |
| **Prescription list** |  |  |  |  |  |
| **Component Code** | **Ingredient Name** |  | **one dose** | **Number of daily doses** | **Number of days to be prepared** |
| 644801980 | Taiguk Dapsone Tablet25mg_(25mg/1 Tablet) |  | 4 | 1 | 30 |
|  |  |  |  |  |  |
| **Pharmacy** | **[Pharmacist:EUNJU LEE]** |  |  |  | **(Number of days to be prepared : 30 days)** |
| **Billing Code** | **Drug name** | **replaced** | **one dose** | **Number of daily doses** | **Number of days to be prepared** |
|  | Taiguk Dapsone Tablet25mg_(25mg/1 Tablet) |  | 4 | 1 | 30 |
|  |  |  |  |  |  |
| **Precautions** |  |  |  |  |  |
| ※ Once a day |  |  |  |  |  |
| [Taiguk Dapsone Tablet25mg] - ●Take at regular time intervals as directed by your doctor. | | | | |  |
| ●If this medicine irritates the stomach, take it with food. | | | |  |  |
| ●Take it with water. | |  |  |  |  |
| ●Even if your symptoms improve, continue taking it for as long as your doctor prescribes. Do not stop taking without your doctor’s instructions. | | | | | |

| **doc 1-4**  **Recording records by period_*****-**** Koh_2011-05-19** | | |  |  |  |
| --- | --- | --- | --- | --- | --- |
|  |  |  |  |  |  |
|  |  |  |  |  | **Visiting Date : [2011-05-19 AM 11:36:37]** |
| **Name** | *****-**** Koh(*/**) |  | **Health insurance subscriber** | *****-**** Koh |  |
| **Resident registration number** | 320420-1****** |  | **Phone number** |  |  |
| **Adress** |  |  |  |  |  |
| **Combination code / Certificate number / Combination name** | |  |  |  | / |
|  |  |  |  |  |  |
| **Grant Number** |  |  | **Doctor** | Eunhee Hong(48110) | |
| **Prescription issuing agency** | Korea Association of Health Promotion’ Clinic | | **Phone number** |  |  |
| **Disease number** |  |  | **Specific symbol** |  |  |
|  |  |  |  |  |  |
| **Prescription list** |  |  |  |  |  |
| **Component Code** | **Ingredient Name** |  | **one dose** | **Number of daily doses** | **Number of days to be prepared** |
| 644801980 | Taiguk Dapsone Tablet25mg_(25mg/1 Tablet) |  | 4 | 1 | 30 |
|  |  |  |  |  |  |
| **Pharmacy** | **[Pharmacist:EUNJU LEE]** |  |  |  | **(Number of days to be prepared : 30 days)** |
| **Billing Code** | **Drug name** | **replaced** | **one dose** | **Number of daily doses** | **Number of days to be prepared** |
|  | Taiguk Dapsone Tablet25mg_(25mg/1 Tablet) |  | 4 | 1 | 30 |
|  |  |  |  |  |  |
| **Precautions** |  |  |  |  |  |
| [Taiguk Dapsone Tablet25mg] - ●Take at regular time intervals as directed by your doctor. | | | | |  |
| ●If this medicine irritates the stomach, take it with food. | | | |  |  |
| ●Take it with water. | |  |  |  |  |
| ●Even if your symptoms improve, continue taking it for as long as your doctor prescribes. Do not stop taking without your doctor’s instructions. | | | | | |

| **doc 1-5**  **Recording records by period_*****-**** Koh_2011-07-06** | | |  |  |  |
| --- | --- | --- | --- | --- | --- |
|  |  |  |  |  |  |
|  |  |  |  |  | **Visiting Date : [2011-07-06 PM 6:15:49]** |
| **Name** | *****-**** Koh(*/**) |  | **Health insurance subscriber** | *****-**** Koh |  |
| **Resident registration number** | 320420-1****** |  | **Phone number** |  |  |
| **Adress** |  |  |  |  |  |
| **Combination code / Certificate number / Combination name** | |  |  |  | / |
|  |  |  |  |  |  |
| **Grant Number** |  |  | **Doctor** | Eunhee Hong(48110) | |
| **Prescription issuing agency** | Korea Association of Health Promotion’ Clinic | | **Phone number** |  |  |
| **Disease number** |  |  | **Specific symbol** |  |  |
|  |  |  |  |  |  |
| **Prescription list** |  |  |  |  |  |
| **Component Code** | **Ingredient Name** |  | **one dose** | **Number of daily doses** | **Number of days to be prepared** |
| 644801980 | Taiguk Dapsone Tablet25mg_(25mg/1 Tablet) |  | 4 | 1 | 30 |
|  |  |  |  |  |  |
| **Pharmacy** | **[Pharmacist:EUNJU LEE]** |  |  |  | **(Number of days to be prepared : 30 days)** |
| **Billing Code** | **Drug name** | **replaced** | **one dose** | **Number of daily doses** | **Number of days to be prepared** |
|  | Taiguk Dapsone Tablet25mg_(25mg/1 Tablet) |  | 4 | 1 | 30 |
|  |  |  |  |  |  |
| **Precautions** |  |  |  |  |  |
| [Taiguk Dapsone Tablet25mg] - Take once a day | |  |  |  |  |

| **doc 1-6**  **Recording records by period_*****-*** Shin_2011-04-13** | | |  |  |  |
| --- | --- | --- | --- | --- | --- |
|  |  |  |  |  |  |
|  |  |  |  |  | **Visiting Date : [2011-04-13 AM 11:41:06]** |
| **Name** | *****-*** Shin(*/**) |  | **Health insurance subscriber** | Jung-won Shin |  |
| **Resident registration number** | 400415-1***** |  | **Phone number** |  |  |
| **Adress** |  |  |  |  |  |
| **Combination code / Certificate number / Combination name** | |  |  |  | 00000000000 / 52016854325 / |
|  |  |  |  |  |  |
| **Grant Number** |  |  | **Doctor** | Jong-guk Lee(4948) | |
| **Prescription issuing agency** | Maronie Clinic |  | **Phone number** | 02-741-4882 | |
| **Disease number** |  |  | **Specific symbol** |  |  |
|  |  |  |  |  |  |
| **Prescription list** |  |  |  |  |  |
| **Component Code** | **Ingredient Name** |  | **one dose** | **Number of daily doses** | **Number of days to be prepared** |
| 644801980 | Taiguk Dapsone Tablet25mg_(25mg/1 Tablet) |  | 1 | 1 | 30 |
|  |  |  |  |  |  |
| **Pharmacy** | **[Pharmacist:EUNJU LEE]** |  |  |  | **(Number of days to be prepared : 30 days)** |
| **Billing Code** | **Drug name** | **replaced** | **one dose** | **Number of daily doses** | **Number of days to be prepared** |
|  | Taiguk Dapsone Tablet25mg_(25mg/1 Tablet) |  | 1 | 1 | 30 |
|  |  |  |  |  |  |
| **Precautions** |  |  |  |  |  |
| [Taiguk Dapsone Tablet25mg] - Once a day | |  |  |  |  |

| **doc 1-7**  **Recording records by period_**** Cho_2010-08-18** | |  |  |  |  |
| --- | --- | --- | --- | --- | --- |
|  |  |  |  |  |  |
|  |  |  |  |  | **Visiting Date : [2010-08-18 PM 6:00:05]** |
| **Name** | **** Cho(*/**) |  | **Health insurance subscriber** | **** Cho |  |
| **Resident registration number** | 331209-2****** |  | **Phone number** |  |  |
| **Adress** | **-* *, ** **** ** ******* , , Seoul | | |  |  |
| **Combination code / Certificate number / Combination name** | |  |  |  | / / Seoul, Office |
|  |  |  |  |  |  |
| **Grant Number** |  |  | **Doctor** | Eunhee Hong(48110) | |
| **Prescription issuing agency** | Korea Association of Health Promotion’ Clinic | | **Phone number** |  |  |
| **Disease number** |  |  | **Specific symbol** |  |  |
|  |  |  |  |  |  |
| **Prescription list** |  |  |  |  |  |
| **Component Code** | **Ingredient Name** |  | **one dose** | **Number of daily doses** | **Number of days to be prepared** |
| 644801980 | Taiguk Dapsone Tablet25mg_(25mg/1 Tablet) |  | 2 | 1 | 30 |
|  |  |  |  |  |  |
| **Pharmacy** | **[Pharmacist:EUNJU LEE]** |  |  |  | **(Number of days to be prepared : 30 days)** |
| **Billing Code** | **Drug name** | **replaced** | **one dose** | **Number of daily doses** | **Number of days to be prepared** |
|  | Taiguk Dapsone Tablet25mg_(25mg/1 Tablet) |  | 2 | 1 | 30 |
|  |  |  |  |  |  |
| **Precautions** |  |  |  |  |  |
| ※ Take once a day | |  |  |  |  |
| [Taiguk Dapsone Tablet25mg] - ●Take at regular time intervals as directed by your doctor. | | | | |  |
| ●If this medicine irritates the stomach, take it with food. | | | |  |  |
| ●Take it with water. | |  |  |  |  |
| ●Even if your symptoms improve, continue taking it for as long as your doctor prescribes. Do not stop taking without your doctor’s instructions. | | | | | |

| **doc 1-8 Recording records by period_**** Cho_2010-09-17** | |  |  |  |  |
| --- | --- | --- | --- | --- | --- |
|  |  |  |  |  |  |
|  |  |  |  |  | **Visiting Date : [2010-09-17 PM 2:52:17]** |
| **Name** | **** Cho(*/**) |  | **Health insurance subscriber** | **** Cho |  |
| **Resident registration number** | 331209-2****** |  | **Phone number** |  |  |
| **Adress** | **-* *, ** **** ** ******* , , Seoul | | |  |  |
| **Engine symbol / Facility symbol / Institution name** | |  |  |  | / / Seoul, Office |
|  |  |  |  |  |  |
| **Grant Number** |  |  | **Doctor** | Eunhee Hong(48110) | |
| **Prescription issuing agency** | Korea Association of Health Promotion’ Clinic | | **Phone number** |  |  |
| **Disease number** |  |  | **Specific symbol** |  |  |
|  |  |  |  |  |  |
| **Prescription list** |  |  |  |  |  |
| **Component Code** | **Ingredient Name** |  | **one dose** | **Number of daily doses** | **Number of days to be prepared** |
| 644801980 | Taiguk Dapsone Tablet25mg_(25mg/1 Tablet) |  | 3 | 1 | 30 |
|  |  |  |  |  |  |
| **Pharmacy** | **[Pharmacist:EUNJU LEE]** |  |  |  | **(Number of days to be prepared : 30 days)** |
| **Billing Code** | **Drug name** | **replaced** | **one dose** | **Number of daily doses** | **Number of days to be prepared** |
|  | Taiguk Dapsone Tablet25mg_(25mg/1 Tablet) |  | 3 | 1 | 30 |
|  |  |  |  |  |  |
| **Precautions** |  |  |  |  |  |
| ※ As directed | |  |  |  |  |
| [Taiguk Dapsone Tablet25mg] - ●Take at regular time intervals as directed by your doctor. | | | | |  |
| ●If this medicine irritates the stomach, take it with food. | | | |  |  |
| ●Take it with water. | |  |  |  |  |
| ●Even if your symptoms improve, continue taking it for as long as your doctor prescribes. Do not stop taking without your doctor’s instructions. | | | | | |

| **doc 1-9**  **Recording records by period_**** Cho_2010-10-19** | |  |  |  |  |
| --- | --- | --- | --- | --- | --- |
|  |  |  |  |  |  |
|  |  |  |  |  | **Visiting Date : [2010-10-19 AM 11:04:18]** |
| **Name** | **** Cho(*/**) |  | **Health insurance subscriber** | **** Cho |  |
| **Resident registration number** | 331209-2****** |  | **Phone number** |  |  |
| **Adress** | **-* *, ** **** ** ******* , , Seoul | | |  |  |
| **Engine symbol / Facility symbol / Institution name** | |  |  |  | / / Seoul, Office |
|  |  |  |  |  |  |
| **Grant Number** |  |  | **Doctor** | Eunhee Hong(48110) | |
| **Prescription issuing agency** | Korea Association of Health Promotion’ Clinic | | **Phone number** |  |  |
| **Disease number** |  |  | **Specific symbol** |  |  |
|  |  |  |  |  |  |
| **Prescription list** |  |  |  |  |  |
| **Component Code** | **Ingredient Name** |  | **one dose** | **Number of daily doses** | **Number of days to be prepared** |
| 644801980 | Taiguk Dapsone Tablet25mg_(25mg/1 Tablet) |  | 2 | 3 | 30 |
|  |  |  |  |  |  |
| **Pharmacy** | **[Pharmacist:EUNJU LEE]** |  |  |  | **(Number of days to be prepared : 30 days)** |
| **Billing Code** | **Drug name** | **replaced** | **one dose** | **Number of daily doses** | **Number of days to be prepared** |
|  | Taiguk Dapsone Tablet25mg_(25mg/1 Tablet) |  | 2 | 3 | 30 |
|  |  |  |  |  |  |
| **Precautions** |  |  |  |  |  |
| ※ Take 3 times a day every 8 hours | |  |  |  |  |
| [Taiguk Dapsone Tablet25mg] - ●Take at regular time intervals as directed by your doctor. | | | | |  |
| ●If this medicine irritates the stomach, take it with food. | | | |  |  |
| ●Take it with water. | |  |  |  |  |
| ●Even if your symptoms improve, continue taking it for as long as your doctor prescribes. Do not stop taking without your doctor’s instructions. | | | | | |

| **doc 1-10**  **Recording records by period_**** Cho_2010-11-15** | |  |  |  |  |
| --- | --- | --- | --- | --- | --- |
|  |  |  |  |  |  |
|  |  |  |  |  | **Visiting Date : [2010-11-15 PM 12:35:18]** |
| **Name** | **** Cho(*/**) |  | **Health insurance subscriber** | **** Cho |  |
| **Resident registration number** | 331209-2****** |  | **Phone number** |  |  |
| **Adress** | **-* *, ** **** ** ******* , , Seoul |  |  |  |  |
| **Engine symbol / Facility symbol / Institution name** | |  |  |  | / / Seoul, Office |
|  |  |  |  |  |  |
| **Grant Number** |  |  | **Doctor** | Eunhee Hong(48110) | |
| **Prescription issuing agency** | Korea Association of Health Promotion’ Clinic |  | **Phone number** |  |  |
| **Disease number** |  |  | **Specific symbol** |  |  |
|  |  |  |  |  |  |
| **Prescription list** |  |  |  |  |  |
| **Component Code** | **Ingredient Name** |  | **one dose** | **Number of daily doses** | **Number of days to be prepared** |
| 644801980 | Taiguk Dapsone Tablet25mg_(25mg/1 Tablet) |  | 2 | 3 | 30 |
| 656700420 | Nelson ibuprofen 200 mg (ibuprofen)_(0.2g/1 Tablet) |  | 1 | 3 | 15 |
|  |  |  |  |  |  |
| **Pharmacy** | **[Pharmacist:EUNJU LEE]** |  |  |  | **(Number of days to be prepared : 30 days)** |
| **Billing Code** | **Drug name** | **replaced** | **one dose** | **Number of daily doses** | **Number of days to be prepared** |
|  | Taiguk Dapsone Tablet25mg_(25mg/1 Tablet) |  | 2 | 3 | 30 |
|  | Hawon Ibuprofen Tablets 200 mg_(0.2g/1 Tablet) | replaced | 1 | 3 | 15 |
|  |  |  |  |  |  |
| **Precautions** |  |  |  |  |  |
| ※ Take 3 times a day every 8 hours | |  |  |  |  |
| [Taiguk Dapsone Tablet25mg] - ●Take at regular time intervals as directed by your doctor. | |  |  |  |  |
| ●If this medicine irritates the stomach, take it with food. | |  |  |  |  |
| ●Take it with water. | |  |  |  |  |
| ●Even if your symptoms improve, continue taking it for as long as your doctor prescribes. Do not stop taking without your doctor’s instructions. | | | |  |  |
| [Hawon Ibuprofen200mg] - ●Take at regular intervals and do not exceed the doses indicated. | |  |  |  |  |
| ●Take it after meals to reduce gastrointestinal disorders. | |  |  |  |  |
| ●If you are uncomfortable with your stomach, take it with food or milk. | |  |  |  |  |
| ●Take it with water exactly as directed and don’t chew on it as it tastes bitter. | |  |  |  |  |
| ●Pay special attention to children and consult a pediatrician or specialist. | |  |  |  |  |

| **doc 1-11**  **Recording records by period_**** Cho_2010-12-17** | |  |  |  |  |
| --- | --- | --- | --- | --- | --- |
|  |  |  |  |  |  |
|  |  |  |  |  | **Visiting Date : [2010-12-17 PM 3:23:29]** |
| **Name** | **** Cho(*/**) |  | **Health insurance subscriber** | **** Cho |  |
| **Resident registration number** | 331209-2****** |  | **Phone number** |  |  |
| **Adress** | **-* *, ** **** ** ******* , , Seoul |  |  |  |  |
| **Engine symbol / Facility symbol / Institution name** | |  |  |  | / / Seoul, Office |
|  |  |  |  |  |  |
| **Grant Number** |  |  | **Doctor** | Eunhee Hong(48110) | |
| **Prescription issuing agency** | Korea Association of Health Promotion’ Clinic |  | **Phone number** |  |  |
| **Disease number** |  |  | **Specific symbol** |  |  |
|  |  |  |  |  |  |
| **Prescription list** |  |  |  |  |  |
| **Component Code** | **Ingredient Name** |  | **one dose** | **Number of daily doses** | **Number of days to be prepared** |
| 644801980 | Taiguk Dapsone Tablet25mg_(25mg/1 Tablet) |  | 3 | 1 | 30 |
| 656700420 | Nelson ibuprofen 200 mg (ibuprofen)_(0.2g/1 Tablet) |  | 1 | 1 | 30 |
|  |  |  |  |  |  |
| **Pharmacy** | **[Pharmacist:EUNJU LEE]** |  |  |  | **(Number of days to be prepared : 30 days)** |
| **Billing Code** | **Drug name** | **replaced** | **one dose** | **Number of daily doses** | **Number of days to be prepared** |
|  | Taiguk Dapsone Tablet25mg_(25mg/1 Tablet) |  | 3 | 1 | 30 |
|  | Hawon Ibuprofen Tablets 200 mg_(0.2g/1 Tablet) | replaced | 1 | 1 | 30 |
|  |  |  |  |  |  |
| **Precautions** |  |  |  |  |  |
| ※ Take once a day | |  |  |  |  |
| [Taiguk Dapsone Tablet25mg] - ●Take at regular time intervals as directed by your doctor. | |  |  |  |  |
| ●If this medicine irritates the stomach, take it with food. | |  |  |  |  |
| ●Take it with water. | |  |  |  |  |
| ●Even if your symptoms improve, continue taking it for as long as your doctor prescribes. Do not stop taking without your doctor’s instructions. | | | |  |  |
| [Hawon Ibuprofen Tablets 200 mg] - ●Take at regular intervals and do not exceed the doses indicated. | | |  |  |  |
| ●Take it after meals to reduce gastrointestinal disorders. | |  |  |  |  |
| ●If you are uncomfortable with your stomach, take it with food or milk. | |  |  |  |  |
| ●Take it with water exactly as directed and don’t chew on it as it tastes bitter. | |  |  |  |  |
| ●Pay special attention to children and consult a pediatrician or specialist. | |  |  |  |  |

| **doc 1-12**  **Recording records by period_**** Cho_2011-01-18** | |  |  |  |  |
| --- | --- | --- | --- | --- | --- |
|  |  |  |  |  |  |
|  |  |  |  |  | **Visiting Date : [2011-01-18 PM 5:37:12]** |
| **Name** | **** Cho(*/**) |  | **Health insurance subscriber** | **** Cho |  |
| **Resident registration number** | 331209-2****** |  | **Phone number** |  |  |
| **Adress** | **-* *, ** **** ** ******* , , Seoul |  |  |  |  |
| **Engine symbol / Facility symbol / Institution name** | |  |  |  | / / Seoul, Office |
|  |  |  |  |  |  |
| **Grant Number** |  |  | **Doctor** | Eunhee Hong(48110) | |
| **Prescription issuing agency** | Korea Association of Health Promotion’ Clinic |  | **Phone number** |  |  |
| **Disease number** |  |  | **Specific symbol** |  |  |
|  |  |  |  |  |  |
| **Prescription list** |  |  |  |  |  |
| **Component Code** | **Ingredient Name** |  | **one dose** | **Number of daily doses** | **Number of days to be prepared** |
| 644801980 | Taiguk Dapsone Tablet25mg_(25mg/1 Tablet) |  | 3 | 1 | 30 |
| 656700420 | Nelson ibuprofen 200 mg (ibuprofen)_(0.2g/1 Tablet) |  | 1 | 1 | 30 |
|  |  |  |  |  |  |
| **Pharmacy** | **[Pharmacist:EUNJU LEE]** |  |  |  | **(Number of days to be prepared : 30 days)** |
| **Billing Code** | **Drug name** | **replaced** | **one dose** | **Number of daily doses** | **Number of days to be prepared** |
|  | Taiguk Dapsone Tablet25mg_(25mg/1 Tablet) |  | 3 | 1 | 30 |
|  | Hawon Ibuprofen Tablets 200 mg_(0.2g/1 Tablet) | replaced | 1 | 1 | 30 |
|  |  |  |  |  |  |
| **Precautions** |  |  |  |  |  |
| ※ Take once a day | |  |  |  |  |
| [Taiguk Dapsone Tablet25mg] - ●Take at regular time intervals as directed by your doctor. | |  |  |  |  |
| ●If this medicine irritates the stomach, take it with food. | |  |  |  |  |
| ●Take it with water. | |  |  |  |  |
| ●Even if your symptoms improve, continue taking it for as long as your doctor prescribes. Do not stop taking without your doctor’s instructions. | | | |  |  |
| [Hawon Ibuprofen Tablets 200 mg] - ●Take at regular intervals and do not exceed the doses indicated. | | |  |  |  |
| ●Take it after meals to reduce gastrointestinal disorders. | |  |  |  |  |
| ●If you are uncomfortable with your stomach, take it with food or milk. | |  |  |  |  |
| ●Take it with water exactly as directed and don’t chew on it as it tastes bitter. | |  |  |  |  |
| ●Pay special attention to children and consult a pediatrician or specialist. | |  |  |  |  |

| **doc 1-13**  **Recording records by period_**** Cho_2011-02-21** | |  |  |  |  |
| --- | --- | --- | --- | --- | --- |
|  |  |  |  |  |  |
|  |  |  |  |  | **Visiting Date : [2011-02-21 PM 6:47:52]** |
| **Name** | **** Cho(*/**) |  | **Health insurance subscriber** | **** Cho |  |
| **Resident registration number** | 331209-2****** |  | **Phone number** |  |  |
| **Adress** | **-* *, ** **** ** ******* , , Seoul |  |  |  |  |
| **Engine symbol / Facility symbol / Institution name** | |  |  |  | / / Seoul, Office |
|  |  |  |  |  |  |
| **Grant Number** |  |  | **Doctor** | Eunhee Hong(48110) | |
| **Prescription issuing agency** | Korea Association of Health Promotion’ Clinic |  | **Phone number** |  |  |
| **Disease number** |  |  | **Specific symbol** |  |  |
|  |  |  |  |  |  |
| **Prescription list** |  |  |  |  |  |
| **Component Code** | **Ingredient Name** |  | **one dose** | **Number of daily doses** | **Number of days to be prepared** |
| 644801980 | Taiguk Dapsone Tablet25mg_(25mg/1 Tablet) |  | 4 | 1 | 30 |
| 656700420 | Nelson ibuprofen 200 mg (ibuprofen)_(0.2g/1 Tablet) |  | 1 | 1 | 30 |
|  |  |  |  |  |  |
| **Pharmacy** | **[Pharmacist:EUNJU LEE]** |  |  |  | **(Number of days to be prepared : 30 days)** |
| **Billing Code** | **Drug name** | **replaced** | **one dose** | **Number of daily doses** | **Number of days to be prepared** |
|  | Taiguk Dapsone Tablet25mg_(25mg/1 Tablet) |  | 4 | 1 | 30 |
|  | Hawon Ibuprofen Tablets 200 mg_(0.2g/1 Tablet) | replaced | 1 | 1 | 30 |
|  |  |  |  |  |  |
| **Precautions** |  |  |  |  |  |
| ※ Take once a day | |  |  |  |  |
| [Taiguk Dapsone Tablet25mg] - ●Take at regular time intervals as directed by your doctor. | |  |  |  |  |
| ●If this medicine irritates the stomach, take it with food. | |  |  |  |  |
| ●Take it with water. | |  |  |  |  |
| ●Even if your symptoms improve, continue taking it for as long as your doctor prescribes. Do not stop taking without your doctor’s instructions. | | | |  |  |
| [Hawon Ibuprofen Tablets 200 mg] - ●Take at regular intervals and do not exceed the doses indicated. | | |  |  |  |
| ●Take it after meals to reduce gastrointestinal disorders. | |  |  |  |  |
| ●If you are uncomfortable with your stomach, take it with food or milk. | |  |  |  |  |
| ●Take it with water exactly as directed and don’t chew on it as it tastes bitter. | |  |  |  |  |
| ●Pay special attention to children and consult a pediatrician or specialist. | |  |  |  |  |

| **doc 1-14**  **Recording records by period_**** Cho_2011-03-15** | |  |  |  |  |
| --- | --- | --- | --- | --- | --- |
|  |  |  |  |  |  |
|  |  |  |  |  | **Visiting Date : [2011-03-15 PM 6:03:59]** |
| **Name** | **** Cho(*/**) |  | **Health insurance subscriber** | **** Cho |  |
| **Resident registration number** | 331209-2****** |  | **Phone number** |  |  |
| **Adress** | **-* *, ** **** ** ******* , , Seoul |  |  |  |  |
| **Engine symbol / Facility symbol / Institution name** | |  |  |  | / / Seoul, Office |
|  |  |  |  |  |  |
| **Grant Number** |  |  | **Doctor** | Eunhee Hong(48110) | |
| **Prescription issuing agency** | Korea Association of Health Promotion’ Clinic |  | **Phone number** |  |  |
| **Disease number** |  |  | **Specific symbol** |  |  |
|  |  |  |  |  |  |
| **Prescription list** |  |  |  |  |  |
| **Component Code** | **Ingredient Name** |  | **one dose** | **Number of daily doses** | **Number of days to be prepared** |
| 644801980 | Taiguk Dapsone Tablet25mg_(25mg/1 Tablet) |  | 4 | 1 | 30 |
| 656700420 | Nelson ibuprofen 200 mg (ibuprofen)_(0.2g/1 Tablet) |  | 1 | 1 | 30 |
|  |  |  |  |  |  |
| **Pharmacy** | **[Pharmacist:EUNJU LEE]** |  |  |  | **(Number of days to be prepared : 30 days)** |
| **Billing Code** | **Drug name** | **replaced** | **one dose** | **Number of daily doses** | **Number of days to be prepared** |
|  | Taiguk Dapsone Tablet25mg_(25mg/1 Tablet) |  | 4 | 1 | 30 |
|  | Hawon Ibuprofen Tablets 200 mg_(0.2g/1 Tablet) | replaced | 1 | 1 | 30 |
|  |  |  |  |  |  |
| **Precautions** |  |  |  |  |  |
| [Taiguk Dapsone Tablet25mg] - ●Take at regular time intervals as directed by your doctor. | |  |  |  |  |
| ●If this medicine irritates the stomach, take it with food. | |  |  |  |  |
| ●Take it with water. | |  |  |  |  |
| ●Even if your symptoms improve, continue taking it for as long as your doctor prescribes. Do not stop taking without your doctor’s instructions. | | | |  |  |
| [Hawon Ibuprofen Tablets 200 mg] - ●Take at regular intervals and do not exceed the doses indicated. | | |  |  |  |
| ●Take it after meals to reduce gastrointestinal disorders. | |  |  |  |  |
| ●If you are uncomfortable with your stomach, take it with food or milk. | |  |  |  |  |
| ●Take it with water exactly as directed and don’t chew on it as it tastes bitter. | |  |  |  |  |
| ●Pay special attention to children and consult a pediatrician or specialist. | |  |  |  |  |

| **doc 1-15**  **Recording records by period_**** Cho_2011-04-14** | |  |  |  |  |
| --- | --- | --- | --- | --- | --- |
|  |  |  |  |  |  |
|  |  |  |  |  | **Visiting Date : [2011-04-14 PM 5:59:22]** |
| **Name** | **** Cho(*/**) |  | **Health insurance subscriber** | **** Cho |  |
| **Resident registration number** | 331209-2****** |  | **Phone number** |  |  |
| **Adress** | **-* *, ** **** ** ******* , , Seoul |  |  |  |  |
| **Engine symbol / Facility symbol / Institution name** | |  |  |  | / / Seoul, Office |
|  |  |  |  |  |  |
| **Grant Number** |  |  | **Doctor** | Eunhee Hong(48110) | |
| **Prescription issuing agency** | Korea Association of Health Promotion’ Clinic |  | **Phone number** |  |  |
| **Disease number** |  |  | **Specific symbol** |  |  |
|  |  |  |  |  |  |
| **Prescription list** |  |  |  |  |  |
| **Component Code** | **Ingredient Name** |  | **one dose** | **Number of daily doses** | **Number of days to be prepared** |
| 644801980 | Taiguk Dapsone Tablet25mg_(25mg/1 Tablet) |  | 4 | 1 | 30 |
| 656700420 | Nelson ibuprofen 200 mg (ibuprofen)_(0.2g/1 Tablet) |  | 1 | 1 | 30 |
|  |  |  |  |  |  |
| **Pharmacy** | **[Pharmacist:EUNJU LEE]** |  |  |  | **(Number of days to be prepared : 30 days)** |
| **Billing Code** | **Drug name** | **replaced** | **one dose** | **Number of daily doses** | **Number of days to be prepared** |
|  | Taiguk Dapsone Tablet25mg_(25mg/1 Tablet) |  | 4 | 1 | 30 |
|  | Nelson ibuprofen 200 mg (ibuprofen)_(0.2g/1 Tablet) |  | 1 | 1 | 30 |
|  |  |  |  |  |  |
| **Precautions** |  |  |  |  |  |
| [Taiguk Dapsone Tablet25mg] - ●Take at regular time intervals as directed by your doctor. | |  |  |  |  |
| ●If this medicine irritates the stomach, take it with food. | |  |  |  |  |
| ●Take it with water. | |  |  |  |  |
| ●Even if your symptoms improve, continue taking it for as long as your doctor prescribes. Do not stop taking without your doctor’s instructions. | | | |  |  |
| [Nelson ibuprofen 200 mg (Ibuprofen)] - ●Take at regular intervals and do not exceed the doses indicated. | | | | |  |
| ●Take it after meals to reduce gastrointestinal disorders. | |  |  |  |  |
| ●If you are uncomfortable with your stomach, take it with food or milk. | |  |  |  |  |
| ●Take it with water exactly as directed and don’t chew on it as it tastes bitter. | |  |  |  |  |
| ●Pay special attention to children and consult a pediatrician or specialist. | |  |  |  |  |

| **doc 1-16**  **Recording records by period_**** Cho_2011-05-19** | |  |  |  |  |
| --- | --- | --- | --- | --- | --- |
|  |  |  |  |  |  |
|  |  |  |  |  | **Visiting Date : [2011-05-19 AM 11:47:19]** |
| **Name** | **** Cho(*/**) |  | **Health insurance subscriber** | **** Cho |  |
| **Resident registration number** | 331209-2****** |  | **Phone number** |  |  |
| **Adress** | **-* *, ** **** ** ******* , , Seoul |  |  |  |  |
| **Engine symbol / Facility symbol / Institution name** | |  |  |  | / / Seoul, Office |
|  |  |  |  |  |  |
| **Grant Number** |  |  | **Doctor** | Eunhee Hong(48110) | |
| **Prescription issuing agency** | Korea Association of Health Promotion’ Clinic |  | **Phone number** |  |  |
| **Disease number** | K253 |  | **Specific symbol** |  |  |
|  |  |  |  |  |  |
| **Prescription list** |  |  |  |  |  |
| **Component Code** | **Ingredient Name** |  | **one dose** | **Number of daily doses** | **Number of days to be prepared** |
| 644801980 | Taiguk Dapsone Tablet25mg_(25mg/1 Tablet) |  | 4 | 1 | 30 |
| 656700420 | Nelson ibuprofen 200 mg (ibuprofen)_(0.2g/1 Tablet) |  | 1 | 1 | 30 |
| 642503560 | Pantoline Tablets (Pantotoprazole Sodium Cesky Hydrate) _ (45.1mg / 1 Tablet) |  | 1 | 1 | 30 |
| 642901800 | Ildong Wool Good Capsule (Benexate Hydrochloride Betadex) _ (0.2g / 1capsules) |  | 1 | 3 | 30 |
| 641600030 | Gas morphine tablets 5 milligrams (mosafrid citrate dihydrate) _ (5.29mg / 1 tablet) |  | 1 | 3 | 30 |
| 642901230 | Almatron Suspension (Almagate) |  | 1 | 3 | 30 |
|  |  |  |  |  |  |
| **Pharmacy** | **[Pharmacist:EUNJU LEE]** |  |  |  | **(Number of days to be prepared : 30 days)** |
| **Billing Code** | **Drug name** | **replaced** | **one dose** | **Number of daily doses** | **Number of days to be prepared** |
|  | Taiguk Dapsone Tablet25mg_(25mg/1 Tablet) |  | 4 | 1 | 30 |
|  | Nelson ibuprofen 200 mg (ibuprofen)_(0.2g/1 Tablet) |  | 1 | 1 | 30 |
|  | Pantoline Tablets (Pantotoprazole Sodium Cesky Hydrate) _ (45.1mg / 1 Tablet) |  | 1 | 1 | 30 |
|  | Ildong Wool Good Capsule (Benexate Hydrochloride Betadex) _ (0.2g / 1capsules) |  | 1 | 3 | 30 |
|  | Gas morphine tablets 5 milligrams (mosafrid citrate dihydrate) _ (5.29mg / 1 tablet) |  | 1 | 3 | 30 |
|  | Almatron Suspension (Almagate) |  | 1 | 3 | 30 |
|  |  |  |  |  |  |
| **Precautions** |  |  |  |  |  |
| ※ Take 30 minutes after breakfast once a day | |  |  |  |  |
| [Pantoline tablets (pantoprazole sodium seskihydrate)]-once a day before bedtime | |  |  |  |  |
| [Ildong Wool Good Capsule (Benexate Betadex)]-3 minutes after meals | |  |  |  |  |
| [Gastine Tablets 5 milligrams (citric acid mosapride)]-Take 30 minutes after meals 3 times a day | |  |  |  |  |
| [Almatron Suspension (Almagate)]-● Take 4 times a day 1-2 hours after meals and at bedtime. | |  |  |  |  |
| ● Take it exactly as directed. | |  |  |  |  |

| **doc 1-17**  **Recording records by period_**** Cho_2011-07-06** | |  |  |  |  |
| --- | --- | --- | --- | --- | --- |
|  |  |  |  |  |  |
|  |  |  |  |  | **Visiting Date : [2011-07-06 PM 6:16:45]** |
| **Name** | **** Cho(*/**) |  | **Health insurance subscriber** | **** Cho |  |
| **Resident registration number** | 331209-2****** |  | **Phone number** |  |  |
| **Adress** | **-* *, ** **** ** ******* , , Seoul |  |  |  |  |
| **Engine symbol / Facility symbol / Institution name** | |  |  |  | / / Seoul, Office |
|  |  |  |  |  |  |
| **Grant Number** |  |  | **Doctor** | Eunhee Hong(48110) | |
| **Prescription issuing agency** | Korea Association of Health Promotion’ Clinic |  | **Phone number** |  |  |
| **Disease number** |  |  | **Specific symbol** |  |  |
|  |  |  |  |  |  |
| **Prescription list** |  |  |  |  |  |
| **Component Code** | **Ingredient Name** |  | **one dose** | **Number of daily doses** | **Number of days to be prepared** |
| 644801980 | Taiguk Dapsone Tablet25mg_(25mg/1 Tablet) |  | 4 | 1 | 30 |
| 656700420 | Nelson ibuprofen 200 mg (ibuprofen)_(0.2g/1 Tablet) |  | 1 | 1 | 30 |
|  |  |  |  |  |  |
| **Pharmacy** | **[Pharmacist:EUNJU LEE]** |  |  |  | **(Number of days to be prepared : 30 days)** |
| **Billing Code** | **Drug name** | **replaced** | **one dose** | **Number of daily doses** | **Number of days to be prepared** |
|  | Taiguk Dapsone Tablet25mg_(25mg/1 Tablet) |  | 4 | 1 | 30 |
|  | Nelson ibuprofen 200 mg (ibuprofen)_(0.2g/1 Tablet) |  | 1 | 1 | 30 |
|  |  |  |  |  |  |
| **Precautions** |  |  |  |  |  |
| ※ Take once a day | |  |  |  |  |
| [Taiguk Dapsone Tablet25mg] - ●Take at regular time intervals as directed by your doctor. | |  |  |  |  |
| ●If this medicine irritates the stomach, take it with food. | |  |  |  |  |
| ●Take it with water. | |  |  |  |  |
| ●Even if your symptoms improve, continue taking it for as long as your doctor prescribes. Do not stop taking without your doctor’s instructions. | | | |  |  |
| [Nelson ibuprofen 200 mg (Ibuprofen)] - ●Take at regular intervals and do not exceed the doses indicated. | | | | |  |
| ●Take it after meals to reduce gastrointestinal disorders. | |  |  |  |  |
| ●If you are uncomfortable with your stomach, take it with food or milk. | |  |  |  |  |
| ●Take it with water exactly as directed and don’t chew on it as it tastes bitter. | |  |  |  |  |
| ●Pay special attention to children and consult a pediatrician or specialist. | |  |  |  |  |

| **doc 1-18**  **Recording records by period_**** Cho_2011-08-04** | |  |  |  |  |
| --- | --- | --- | --- | --- | --- |
|  |  |  |  |  |  |
|  |  |  |  |  | **Visiting Date : [2011-08-04 PM 5:36:40]** |
| **Name** | **** Cho(*/**) |  | **Health insurance subscriber** | **** Cho |  |
| **Resident registration number** | 331209-2****** |  | **Phone number** |  |  |
| **Adress** | **-* *, ** **** ** ******* , , Seoul |  |  |  |  |
| **Engine symbol / Facility symbol / Institution name** | |  |  |  | / / Seoul, Office |
|  |  |  |  |  |  |
| **Grant Number** |  |  | **Doctor** | 김호연(106714) | |
| **Prescription issuing agency** | Korea Association of Health Promotion’ Clinic |  | **Phone number** | 0328847131 |  |
| **Disease number** |  |  | **Specific symbol** |  |  |
|  |  |  |  |  |  |
| **Prescription list** |  |  |  |  |  |
| **Component Code** | **Ingredient Name** |  | **one dose** | **Number of daily doses** | **Number of days to be prepared** |
| 644801980 | Taiguk Dapsone Tablet25mg_(25mg/1 Tablet) |  | 4 | 1 | 30 |
| 656700420 | Nelson ibuprofen 200 mg (ibuprofen)_(0.2g/1 Tablet) |  | 1 | 1 | 30 |
|  |  |  |  |  |  |
| **Pharmacy** | **[Pharmacist:EUNJU LEE]** |  |  |  | **(Number of days to be prepared : 30 days)** |
| **Billing Code** | **Drug name** | **replaced** | **one dose** | **Number of daily doses** | **Number of days to be prepared** |
|  | Taiguk Dapsone Tablet25mg_(25mg/1 Tablet) |  | 4 | 1 | 30 |
|  | Hawon Ibuprofen Tablets 200 mg_(0.2g/1 Tablet) | replaced | 1 | 1 | 30 |
|  |  |  |  |  |  |
| **Precautions** |  |  |  |  |  |
| ※3 times a day after meals | |  |  |  |  |
| [Taiguk Dapsone Tablet25mg] - ●Take at regular time intervals as directed by your doctor. | |  |  |  |  |
| ●If this medicine irritates the stomach, take it with food. | |  |  |  |  |
| ●Take it with water. | |  |  |  |  |
| ●Even if your symptoms improve, continue taking it for as long as your doctor prescribes. Do not stop taking without your doctor’s instructions. | | | |  |  |
| [Hawon Ibuprofen Tablets 200 mg] - ●Take at regular intervals and do not exceed the doses indicated. | | |  |  |  |
| ●Take it after meals to reduce gastrointestinal disorders. | |  |  |  |  |
| ●If you are uncomfortable with your stomach, take it with food or milk. | |  |  |  |  |
| ●Take it with water exactly as directed and don’t chew on it as it tastes bitter. | |  |  |  |  |
| ●Pay special attention to children and consult a pediatrician or specialist. | |  |  |  |  |

| **doc 1-19**  **Recording records by period_**** Cho_2011-09-02** | |  |  |  |  |
| --- | --- | --- | --- | --- | --- |
|  |  |  |  |  |  |
|  |  |  |  |  | **Visiting Date : [2011-09-02 PM 6:02:18]** |
| **Name** | **** Cho(*/**) |  | **Health insurance subscriber** | **** Cho |  |
| **Resident registration number** | 331209-2****** |  | **Phone number** |  |  |
| **Adress** | **-* *, ** **** ** ******* , , Seoul |  |  |  |  |
| **Engine symbol / Facility symbol / Institution name** | |  |  |  | / / Seoul, Office |
|  |  |  |  |  |  |
| **Grant Number** |  |  | **Doctor** | Eunhee Hong(48110) | |
| **Prescription issuing agency** | Korea Association of Health Promotion’ Clinic |  | **Phone number** |  |  |
| **Disease number** |  |  | **Specific symbol** |  |  |
|  |  |  |  |  |  |
| **Prescription list** |  |  |  |  |  |
| **Component Code** | **Ingredient Name** |  | **one dose** | **Number of daily doses** | **Number of days to be prepared** |
| 644801980 | Taiguk Dapsone Tablet25mg_(25mg/1 Tablet) |  | 4 | 1 | 30 |
| 656700420 | Nelson ibuprofen 200 mg (ibuprofen)_(0.2g/1 Tablet) |  | 1 | 1 | 30 |
|  |  |  |  |  |  |
| **Pharmacy** | **[Pharmacist:EUNJU LEE]** |  |  |  | **(Number of days to be prepared : 30 days)** |
| **Billing Code** | **Drug name** | **replaced** | **one dose** | **Number of daily doses** | **Number of days to be prepared** |
|  | Taiguk Dapsone Tablet25mg_(25mg/1 Tablet) |  | 4 | 1 | 30 |
|  | Hawon Ibuprofen Tablets 200 mg_(0.2g/1 Tablet) | replaced | 1 | 1 | 30 |
|  |  |  |  |  |  |
| **Precautions** |  |  |  |  |  |
| ※ Take once a day | |  |  |  |  |
| [Taiguk Dapsone Tablet25mg] - ●Take at regular time intervals as directed by your doctor. | |  |  |  |  |
| ●If this medicine irritates the stomach, take it with food. | |  |  |  |  |
| ●Take it with water. | |  |  |  |  |
| ●Even if your symptoms improve, continue taking it for as long as your doctor prescribes. Do not stop taking without your doctor’s instructions. | | | |  |  |
| [Hawon Ibuprofen Tablets 200 mg] - ●Take at regular intervals and do not exceed the doses indicated. | | |  |  |  |
| ●Take it after meals to reduce gastrointestinal disorders. | |  |  |  |  |
| ●If you are uncomfortable with your stomach, take it with food or milk. | |  |  |  |  |
| ●Take it with water exactly as directed and don’t chew on it as it tastes bitter. | |  |  |  |  |
| ●Pay special attention to children and consult a pediatrician or specialist. | |  |  |  |  |

| **doc 1-20**  **Recording records by period_**** Cho_2011-09-30** | |  |  |  |  |
| --- | --- | --- | --- | --- | --- |
|  |  |  |  |  |  |
|  |  |  |  |  | **Visiting Date : [2011-09-30 PM 7:44:04]** |
| **Name** | **** Cho(*/**) |  | **Health insurance subscriber** | **** Cho |  |
| **Resident registration number** | 331209-2****** |  | **Phone number** |  |  |
| **Adress** | **-* *, ** **** ** ******* , , Seoul |  |  |  |  |
| **Engine symbol / Facility symbol / Institution name** | |  |  |  | / / Seoul, Office |
|  |  |  |  |  |  |
| **Grant Number** |  |  | **Doctor** | Eunhee Hong(48110) | |
| **Prescription issuing agency** | Korea Association of Health Promotion’ Clinic |  | **Phone number** |  |  |
| **Disease number** |  |  | **Specific symbol** |  |  |
|  |  |  |  |  |  |
| **Prescription list** |  |  |  |  |  |
| **Component Code** | **Ingredient Name** |  | **one dose** | **Number of daily doses** | **Number of days to be prepared** |
| 644801980 | Taiguk Dapsone Tablet25mg_(25mg/1 Tablet) |  | 4 | 1 | 30 |
| 656700420 | Nelson ibuprofen 200 mg (ibuprofen)_(0.2g/1 Tablet) |  | 1 | 1 | 30 |
|  |  |  |  |  |  |
| **Pharmacy** | **[Pharmacist:EUNJU LEE]** |  |  |  | **(Number of days to be prepared : 30 days)** |
| **Billing Code** | **Drug name** | **replaced** | **one dose** | **Number of daily doses** | **Number of days to be prepared** |
|  | Taiguk Dapsone Tablet25mg_(25mg/1 Tablet) |  | 4 | 1 | 30 |
|  | Hawon Ibuprofen Tablets 200 mg_(0.2g/1 Tablet) | replaced | 1 | 1 | 30 |
|  |  |  |  |  |  |
| **Precautions** |  |  |  |  |  |
| ※ Take once a day | |  |  |  |  |
| [Taiguk Dapsone Tablet25mg] - ●Take at regular time intervals as directed by your doctor. | |  |  |  |  |
| ●If this medicine irritates the stomach, take it with food. | |  |  |  |  |
| ●Take it with water. | |  |  |  |  |
| ●Even if your symptoms improve, continue taking it for as long as your doctor prescribes. Do not stop taking without your doctor’s instructions. | | | |  |  |
| [Hawon Ibuprofen Tablets 200 mg] - ●Take at regular intervals and do not exceed the doses indicated. | | |  |  |  |
| ●Take it after meals to reduce gastrointestinal disorders. | |  |  |  |  |
| ●If you are uncomfortable with your stomach, take it with food or milk. | |  |  |  |  |
| ●Take it with water exactly as directed and don’t chew on it as it tastes bitter. | |  |  |  |  |
| ●Pay special attention to children and consult a pediatrician or specialist. | |  |  |  |  |

| **doc 1-21**  **Recording records by period_**** Cho_2011-11-04** | |  |  |  |  |
| --- | --- | --- | --- | --- | --- |
|  |  |  |  |  |  |
|  |  |  |  |  | **Visiting Date : [2011-11-04 AM 9:37:02]** |
| **Name** | **** Cho(*/**) |  | **Health insurance subscriber** | **** Cho |  |
| **Resident registration number** | 331209-2****** |  | **Phone number** |  |  |
| **Adress** | **-* *, ** **** ** ******* , , Seoul |  |  |  |  |
| **Engine symbol / Facility symbol / Institution name** | |  |  |  | / / Seoul, Office |
|  |  |  |  |  |  |
| **Grant Number** |  |  | **Doctor** | Eunhee Hong(48110) | |
| **Prescription issuing agency** | Korea Association of Health Promotion’ Clinic |  | **Phone number** |  |  |
| **Disease number** |  |  | **Specific symbol** |  |  |
|  |  |  |  |  |  |
| **Prescription list** |  |  |  |  |  |
| **Component Code** | **Ingredient Name** |  | **one dose** | **Number of daily doses** | **Number of days to be prepared** |
| 644801980 | Taiguk Dapsone Tablet25mg_(25mg/1 Tablet) |  | 4 | 1 | 30 |
| 656700420 | Nelson ibuprofen 200 mg (ibuprofen)_(0.2g/1 Tablet) |  | 1 | 1 | 30 |
|  |  |  |  |  |  |
| **Pharmacy** | **[Pharmacist:EUNJU LEE]** |  |  |  | **(Number of days to be prepared : 30 days)** |
| **Billing Code** | **Drug name** | **replaced** | **one dose** | **Number of daily doses** | **Number of days to be prepared** |
|  | Taiguk Dapsone Tablet25mg_(25mg/1 Tablet) |  | 4 | 1 | 30 |
|  | Hawon Ibuprofen Tablets 200 mg_(0.2g/1 Tablet) | replaced | 1 | 1 | 30 |
|  |  |  |  |  |  |
| **Precautions** |  |  |  |  |  |
| [Taiguk Dapsone Tablet25mg] - ●Take at regular time intervals as directed by your doctor. | |  |  |  |  |
| ●If this medicine irritates the stomach, take it with food. | |  |  |  |  |
| ●Take it with water. | |  |  |  |  |
| ●Even if your symptoms improve, continue taking it for as long as your doctor prescribes. Do not stop taking without your doctor’s instructions. | | | |  |  |
| [Hawon Ibuprofen Tablets 200 mg] - ●Take at regular intervals and do not exceed the doses indicated. | | |  |  |  |
| ●Take it after meals to reduce gastrointestinal disorders. | |  |  |  |  |
| ●If you are uncomfortable with your stomach, take it with food or milk. | |  |  |  |  |
| ●Take it with water exactly as directed and don’t chew on it as it tastes bitter. | |  |  |  |  |
| ●Pay special attention to children and consult a pediatrician or specialist. | |  |  |  |  |

| **doc 1-22**  **Recording records by period_**** Cho_2011-12-08** | |  |  |  |  |
| --- | --- | --- | --- | --- | --- |
|  |  |  |  |  |  |
|  |  |  |  |  | **Visiting Date : [2011-12-08 PM 1:50:17]** |
| **Name** | **** Cho(*/**) |  | **Health insurance subscriber** | **** Cho |  |
| **Resident registration number** | 331209-2****** |  | **Phone number** |  |  |
| **Adress** | **-* *, ** **** ** ******* , , Seoul |  |  |  |  |
| **Engine symbol / Facility symbol / Institution name** | |  |  |  | / / Seoul, Office |
|  |  |  |  |  |  |
| **Grant Number** |  |  | **Doctor** | Eunhee Hong(48110) | |
| **Prescription issuing agency** | Korea Association of Health Promotion’ Clinic |  | **Phone number** |  |  |
| **Disease number** |  |  | **Specific symbol** |  |  |
|  |  |  |  |  |  |
| **Prescription list** |  |  |  |  |  |
| **Component Code** | **Ingredient Name** |  | **one dose** | **Number of daily doses** | **Number of days to be prepared** |
| 644801980 | Taiguk Dapsone Tablet25mg_(25mg/1 Tablet) |  | 4 | 1 | 30 |
| 656700420 | Nelson ibuprofen 200 mg (ibuprofen)_(0.2g/1 Tablet) |  | 1 | 1 | 30 |
|  |  |  |  |  |  |
| **Pharmacy** | **[Pharmacist:EUNJU LEE]** |  |  |  | **(Number of days to be prepared : 30 days)** |
| **Billing Code** | **Drug name** | **replaced** | **one dose** | **Number of daily doses** | **Number of days to be prepared** |
|  | Taiguk Dapsone Tablet25mg_(25mg/1 Tablet) |  | 4 | 1 | 30 |
|  | Hawon Ibuprofen Tablets 200 mg_(0.2g/1 Tablet) | replaced | 1 | 1 | 30 |
|  |  |  |  |  |  |
| **Precautions** |  |  |  |  |  |
| [Taiguk Dapsone Tablet25mg] - ●Take at regular time intervals as directed by your doctor. | |  |  |  |  |
| ●If this medicine irritates the stomach, take it with food. | |  |  |  |  |
| ●Take it with water. | |  |  |  |  |
| ●Even if your symptoms improve, continue taking it for as long as your doctor prescribes. Do not stop taking without your doctor’s instructions. | | | |  |  |
| [Hawon Ibuprofen Tablets 200 mg] - ●Take at regular intervals and do not exceed the doses indicated. | | |  |  |  |
| ●Take it after meals to reduce gastrointestinal disorders. | |  |  |  |  |
| ●If you are uncomfortable with your stomach, take it with food or milk. | |  |  |  |  |
| ●Take it with water exactly as directed and don’t chew on it as it tastes bitter. | |  |  |  |  |
| ●Pay special attention to children and consult a pediatrician or specialist. | |  |  |  |  |

| **doc 1-23**  **Recording records by period_**** Cho_2012-02-17** | |  |  |  |  |
| --- | --- | --- | --- | --- | --- |
|  |  |  |  |  |  |
|  |  |  |  |  | **Visiting Date : [2012-02-17 PM 5:59:39]** |
| **Name** | **** Cho(*/**) |  | **Health insurance subscriber** | **** Cho |  |
| **Resident registration number** | 331209-2****** |  | **Phone number** |  |  |
| **Adress** | **-* *, ** **** ** ******* , , Seoul |  |  |  |  |
| **Engine symbol / Facility symbol / Institution name** | |  |  |  | / / Seoul, Office |
|  |  |  |  |  |  |
| **Grant Number** |  |  | **Doctor** | Eunhee Hong(48110) | |
| **Prescription issuing agency** | Korea Association of Health Promotion’ Clinic |  | **Phone number** |  |  |
| **Disease number** |  |  | **Specific symbol** |  |  |
|  |  |  |  |  |  |
| **Prescription list** |  |  |  |  |  |
| **Component Code** | **Ingredient Name** |  | **one dose** | **Number of daily doses** | **Number of days to be prepared** |
| 644801980 | Taiguk Dapsone Tablet25mg_(25mg/1 Tablet) |  | 4 | 1 | 30 |
| 656700420 | Nelson ibuprofen 200 mg (ibuprofen)_(0.2g/1 Tablet) |  | 1 | 1 | 30 |
|  |  |  |  |  |  |
| **Pharmacy** | **[Pharmacist:EUNJU LEE]** |  |  |  | **(Number of days to be prepared : 30 days)** |
| **Billing Code** | **Drug name** | **replaced** | **one dose** | **Number of daily doses** | **Number of days to be prepared** |
|  | Taiguk Dapsone Tablet25mg_(25mg/1 Tablet) |  | 4 | 1 | 30 |
|  | Hawon Ibuprofen Tablets 200 mg_(0.2g/1 Tablet) | replaced | 1 | 1 | 30 |
|  |  |  |  |  |  |
| **Precautions** |  |  |  |  |  |
| [Taiguk Dapsone Tablet25mg] - ●Take at regular time intervals as directed by your doctor. | |  |  |  |  |
| ●If this medicine irritates the stomach, take it with food. | |  |  |  |  |
| ●Take it with water. | |  |  |  |  |
| ●Even if your symptoms improve, continue taking it for as long as your doctor prescribes. Do not stop taking without your doctor’s instructions. | | | |  |  |
| [Hawon Ibuprofen Tablets 200 mg] - ●Take at regular intervals and do not exceed the doses indicated. | | |  |  |  |
| ●Take it after meals to reduce gastrointestinal disorders. | |  |  |  |  |
| ●If you are uncomfortable with your stomach, take it with food or milk. | |  |  |  |  |
| ●Take it with water exactly as directed and don’t chew on it as it tastes bitter. | |  |  |  |  |
| ●Pay special attention to children and consult a pediatrician or specialist. | |  |  |  |  |

| **doc 1-24**  **Recording records by period_**** Cho_2012-04-09** | |  |  |  |  |
| --- | --- | --- | --- | --- | --- |
|  |  |  |  |  |  |
|  |  |  |  |  | **Visiting Date : [2012-04-09 PM 6:12:42]** |
| **Name** | **** Cho(*/**) |  | **Health insurance subscriber** | **** Cho |  |
| **Resident registration number** | 331209-2****** |  | **Phone number** |  |  |
| **Adress** | **-* *, ** **** ** ******* , , Seoul |  |  |  |  |
| **Engine symbol / Facility symbol / Institution name** | |  |  |  | / / Seoul, Office |
|  |  |  |  |  |  |
| **Grant Number** |  |  | **Doctor** | Eunhee Hong(48110) | |
| **Prescription issuing agency** | Korea Association of Health Promotion’ Clinic |  | **Phone number** |  |  |
| **Disease number** |  |  | **Specific symbol** |  |  |
|  |  |  |  |  |  |
| **Prescription list** |  |  |  |  |  |
| **Component Code** | **Ingredient Name** |  | **one dose** | **Number of daily doses** | **Number of days to be prepared** |
| 644801980 | Taiguk Dapsone Tablet25mg_(25mg/1 Tablet) |  | 4 | 1 | 30 |
| 656700420 | Nelson ibuprofen 200 mg (ibuprofen)_(0.2g/1 Tablet) |  | 1 | 1 | 30 |
|  |  |  |  |  |  |
| **Pharmacy** | **[Pharmacist:EUNJU LEE]** |  |  |  | **(Number of days to be prepared : 30 days)** |
| **Billing Code** | **Drug name** | **replaced** | **one dose** | **Number of daily doses** | **Number of days to be prepared** |
|  | Taiguk Dapsone Tablet25mg_(25mg/1 Tablet) |  | 4 | 1 | 30 |
|  | Hawon Ibuprofen Tablets 200 mg_(0.2g/1 Tablet) | replaced | 1 | 1 | 30 |
|  |  |  |  |  |  |
| **Precautions** |  |  |  |  |  |
| [Taiguk Dapsone Tablet25mg] - ●Take at regular time intervals as directed by your doctor. | |  |  |  |  |
| ●If this medicine irritates the stomach, take it with food. | |  |  |  |  |
| ●Take it with water. | |  |  |  |  |
| ●Even if your symptoms improve, continue taking it for as long as your doctor prescribes. Do not stop taking without your doctor’s instructions. | | | |  |  |
| [Hawon Ibuprofen Tablets 200 mg] - ●Take at regular intervals and do not exceed the doses indicated. | | |  |  |  |
| ●Take it after meals to reduce gastrointestinal disorders. | |  |  |  |  |
| ●If you are uncomfortable with your stomach, take it with food or milk. | |  |  |  |  |
| ●Take it with water exactly as directed and don’t chew on it as it tastes bitter. | |  |  |  |  |
| ●Pay special attention to children and consult a pediatrician or specialist. | |  |  |  |  |

| **doc 1-25**  **Recording records by period_**** Cho_2012-08-14** | |  |  |  |  |
| --- | --- | --- | --- | --- | --- |
|  |  |  |  |  |  |
|  |  |  |  |  | **Visiting Date : [2012-08-14 PM 6:09:32]** |
| **Name** | **** Cho(*/**) |  | **Health insurance subscriber** | **** Cho |  |
| **Resident registration number** | 331209-2****** |  | **Phone number** |  |  |
| **Adress** | **-* *, ** **** ** ******* , , Seoul |  |  |  |  |
| **Engine symbol / Facility symbol / Institution name** | |  |  |  | / / Seoul, Office |
|  |  |  |  |  |  |
| **Grant Number** |  |  | **Doctor** | Eunhee Hong(48110) | |
| **Prescription issuing agency** | Korea Association of Health Promotion’ Clinic |  | **Phone number** |  |  |
| **Disease number** |  |  | **Specific symbol** |  |  |
|  |  |  |  |  |  |
| **Prescription list** |  |  |  |  |  |
| **Component Code** | **Ingredient Name** |  | **one dose** | **Number of daily doses** | **Number of days to be prepared** |
| 644801980 | Taiguk Dapsone Tablet25mg_(25mg/1 Tablet) |  | 4 | 1 | 30 |
| 656700420 | Nelson ibuprofen 200 mg (ibuprofen)_(0.2g/1 Tablet) |  | 1 | 1 | 30 |
|  |  |  |  |  |  |
| **Pharmacy** | **[Pharmacist:EUNJU LEE]** |  |  |  | **(Number of days to be prepared : 30 days)** |
| **Billing Code** | **Drug name** | **replaced** | **one dose** | **Number of daily doses** | **Number of days to be prepared** |
|  | Taiguk Dapsone Tablet25mg_(25mg/1 Tablet) |  | 4 | 1 | 30 |
|  | Hawon Ibuprofen Tablets 200 mg_(0.2g/1 Tablet) | replaced | 1 | 1 | 30 |
|  |  |  |  |  |  |
| **Precautions** |  |  |  |  |  |
| ※ Take once a day | |  |  |  |  |
| [Taiguk Dapsone Tablet25mg] - ●Take at regular time intervals as directed by your doctor. | |  |  |  |  |
| ●If this medicine irritates the stomach, take it with food. | |  |  |  |  |
| ●Take it with water. | |  |  |  |  |
| ●Even if your symptoms improve, continue taking it for as long as your doctor prescribes. Do not stop taking without your doctor’s instructions. | | | |  |  |
| [Hawon Ibuprofen Tablets 200 mg] - ●Take at regular intervals and do not exceed the doses indicated. | | |  |  |  |
| ●Take it after meals to reduce gastrointestinal disorders. | |  |  |  |  |
| ●If you are uncomfortable with your stomach, take it with food or milk. | |  |  |  |  |
| ●Take it with water exactly as directed and don’t chew on it as it tastes bitter. | |  |  |  |  |
| ●Pay special attention to children and consult a pediatrician or specialist. | |  |  |  |  |

| **doc 1-26**  **Recording records by period_**** Cho_2012-09-24** | |  |  |  |  |
| --- | --- | --- | --- | --- | --- |
|  |  |  |  |  |  |
|  |  |  |  |  | **Visiting Date : [2012-09-24 PM 7:32:00]** |
| **Name** | **** Cho(*/**) |  | **Health insurance subscriber** | **** Cho |  |
| **Resident registration number** | 331209-2****** |  | **Phone number** |  |  |
| **Adress** | **-* *, ** **** ** ******* , , Seoul |  |  |  |  |
| **Engine symbol / Facility symbol / Institution name** | |  |  |  | / / Seoul, Office |
|  |  |  |  |  |  |
| **Grant Number** |  |  | **Doctor** | Eunhee Hong(48110) | |
| **Prescription issuing agency** | Korea Association of Health Promotion’ Clinic |  | **Phone number** |  |  |
| **Disease number** |  |  | **Specific symbol** |  |  |
|  |  |  |  |  |  |
| **Prescription list** |  |  |  |  |  |
| **Component Code** | **Ingredient Name** |  | **one dose** | **Number of daily doses** | **Number of days to be prepared** |
| 644801980 | Taiguk Dapsone Tablet25mg_(25mg/1 Tablet) |  | 4 | 1 | 30 |
| 656700420 | Nelson ibuprofen 200 mg (ibuprofen)_(0.2g/1 Tablet) |  | 1 | 1 | 30 |
|  |  |  |  |  |  |
| **Pharmacy** | **[Pharmacist:EUNJU LEE]** |  |  |  | **(Number of days to be prepared : 30 days)** |
| **Billing Code** | **Drug name** | **replaced** | **one dose** | **Number of daily doses** | **Number of days to be prepared** |
|  | Taiguk Dapsone Tablet25mg_(25mg/1 Tablet) |  | 4 | 1 | 30 |
|  | Hawon Ibuprofen Tablets 200 mg_(0.2g/1 Tablet) | replaced | 1 | 1 | 30 |
|  |  |  |  |  |  |
| **Precautions** |  |  |  |  |  |
| ※ Take once a day | |  |  |  |  |
| [Taiguk Dapsone Tablet25mg] - ●Take at regular time intervals as directed by your doctor. | |  |  |  |  |
| ●If this medicine irritates the stomach, take it with food. | |  |  |  |  |
| ●Take it with water. | |  |  |  |  |
| ●Even if your symptoms improve, continue taking it for as long as your doctor prescribes. Do not stop taking without your doctor’s instructions. | | | |  |  |
| [Hawon Ibuprofen Tablets 200 mg] - ●Take at regular intervals and do not exceed the doses indicated. | | |  |  |  |
| ●Take it after meals to reduce gastrointestinal disorders. | |  |  |  |  |
| ●If you are uncomfortable with your stomach, take it with food or milk. | |  |  |  |  |
| ●Take it with water exactly as directed and don’t chew on it as it tastes bitter. | |  |  |  |  |
| ●Pay special attention to children and consult a pediatrician or specialist. | |  |  |  |  |

| **doc 1-27**  **Recording records by period_**** Cho_2012-11-02** | |  |  |  |  |
| --- | --- | --- | --- | --- | --- |
|  |  |  |  |  |  |
|  |  |  |  |  | **Visiting Date : [2012-11-02 PM 5:22:46]** |
| **Name** | **** Cho(*/**) |  | **Health insurance subscriber** | **** Cho |  |
| **Resident registration number** | 331209-2****** |  | **Phone number** |  |  |
| **Adress** | **-* *, ** **** ** ******* , , Seoul |  |  |  |  |
| **Engine symbol / Facility symbol / Institution name** | |  |  |  | / / Seoul, Office |
|  |  |  |  |  |  |
| **Grant Number** |  |  | **Doctor** | Eunhee Hong(48110) | |
| **Prescription issuing agency** | Korea Association of Health Promotion’ Clinic |  | **Phone number** |  |  |
| **Disease number** |  |  | **Specific symbol** |  |  |
|  |  |  |  |  |  |
| **Prescription list** |  |  |  |  |  |
| **Component Code** | **Ingredient Name** |  | **one dose** | **Number of daily doses** | **Number of days to be prepared** |
| 644801990 | Taiguk Dapsone Tablet100mg_(0.1g/1 Tablet) |  | 1 | 1 | 30 |
| 656700420 | Nelson ibuprofen 200 mg (ibuprofen)_(0.2g/1 Tablet) |  | 1 | 1 | 30 |
|  |  |  |  |  |  |
| **Pharmacy** | **[Pharmacist:EUNJU LEE]** |  |  |  | **(Number of days to be prepared : 30 days)** |
| **Billing Code** | **Drug name** | **replaced** | **one dose** | **Number of daily doses** | **Number of days to be prepared** |
| A08601041 | Taiguk Dapsone Tablet100mg_(0.1g/1 Tablet) |  | 1 | 1 | 30 |
|  | Hawon Ibuprofen Tablets 200 mg_(0.2g/1 Tablet) | replaced | 1 | 1 | 30 |
|  |  |  |  |  |  |
| **Precautions** |  |  |  |  |  |
| [Taiguk Dapsone Tablet100mg]-1. Take after meals. | |  |  |  |  |
| 2. Tell your doctor about your current medicines and past and current illnesses. | |  |  |  |  |
| 3. Wear sun products in case of excessive sun exposure. | |  |  |  |  |
| 4. If the rash appears, stop taking the medication and inform your doctor or pharmacist. | |  |  |  |  |
| [Hawon Ibuprofen Tablets 200 mg] - ●Take at regular intervals and do not exceed the doses indicated. | | |  |  |  |
| ●Take it after meals to reduce gastrointestinal disorders. | |  |  |  |  |
| ●If you are uncomfortable with your stomach, take it with food or milk. | |  |  |  |  |
| ●Take it with water exactly as directed and don’t chew on it as it tastes bitter. | |  |  |  |  |
| ●Pay special attention to children and consult a pediatrician or specialist. | |  |  |  |  |

| **doc 1-28**  **Recording records by period_**** Cho_2013-01-18** | |  |  |  |  |
| --- | --- | --- | --- | --- | --- |
|  |  |  |  |  |  |
|  |  |  |  |  | **Visiting Date : [2013-01-18 PM 7:46:07]** |
| **Name** | **** Cho(*/**) |  | **Health insurance subscriber** | **** Cho |  |
| **Resident registration number** | 331209-2****** |  | **Phone number** |  |  |
| **Adress** | **-* *, ** **** ** ******* , , Seoul |  |  |  |  |
| **Engine symbol / Facility symbol / Institution name** | |  |  |  | / / Seoul, Office |
|  |  |  |  |  |  |
| **Grant Number** |  |  | **Doctor** | Hyungseok Kim(61427) | |
| **Prescription issuing agency** | Korea Association of Health Promotion’ Clinic |  | **Phone number** | 0328847131 |  |
| **Disease number** | / |  | **Specific symbol** |  |  |
|  |  |  |  |  |  |
| **Prescription list** |  |  |  |  |  |
| **Component Code** | **Ingredient Name** |  | **one dose** | **Number of daily doses** | **Number of days to be prepared** |
| 656700420 | Nelson ibuprofen 200 mg (ibuprofen)_(0.2g/1 Tablet) |  | 1 | 1 | 30 |
| 644801990 | Taiguk Dapsone Tablet100mg_(0.1g/1 Tablet) |  | 1 | 1 | 30 |
|  |  |  |  |  |  |
| **Pharmacy** | **[Pharmacist:EUNJU LEE]** |  |  |  | **(Number of days to be prepared : 30 days)** |
| **Billing Code** | **Drug name** | **replaced** | **one dose** | **Number of daily doses** | **Number of days to be prepared** |
|  | Hawon Ibuprofen Tablets 200 mg_(0.2g/1 Tablet) | replaced | 1 | 1 | 30 |
| A08601041 | Taiguk Dapsone Tablet100mg_(0.1g/1 Tablet) |  | 1 | 1 | 30 |
|  |  |  |  |  |  |
| **Precautions** |  |  |  |  |  |
| [Hawon Ibuprofen Tablets 200 mg] - ●Take at regular intervals and do not exceed the doses indicated. | | |  |  |  |
| ●Take it after meals to reduce gastrointestinal disorders. | |  |  |  |  |
| ●If you are uncomfortable with your stomach, take it with food or milk. | |  |  |  |  |
| ●Take it with water exactly as directed and don’t chew on it as it tastes bitter. | |  |  |  |  |
| ●Pay special attention to children and consult a pediatrician or specialist. | |  |  |  |  |
| [Taiguk Dapsone Tablet100mg]-1. Take after meals. | |  |  |  |  |
| 2. Tell your doctor about your current medicines and past and current illnesses. | |  |  |  |  |
| 3. Wear sun products in case of excessive sun exposure. | |  |  |  |  |
| 4. If the rash appears, stop taking the medication and inform your doctor or pharmacist. | |  |  |  |  |

| **doc 1-29**  **Recording records by period_**** Cho_2013-04-13** | |  |  |  |  |
| --- | --- | --- | --- | --- | --- |
|  |  |  |  |  |  |
|  |  |  |  |  | **Visiting Date : [2013-04-13 PM 1:10:20]** |
| **Name** | **** Cho(*/**) |  | **Health insurance subscriber** | **** Cho |  |
| **Resident registration number** | 331209-2****** |  | **Phone number** |  |  |
| **Adress** | **-* *, ** **** ** ******* , , Seoul |  |  |  |  |
| **Engine symbol / Facility symbol / Institution name** | |  |  |  | / / Seoul, Office |
|  |  |  |  |  |  |
| **Grant Number** |  |  | **Doctor** | Eunhee Hong(48110) | |
| **Prescription issuing agency** | Korea Association of Health Promotion’ Clinic |  | **Phone number** |  |  |
| **Disease number** |  |  | **Specific symbol** |  |  |
|  |  |  |  |  |  |
| **Prescription list** |  |  |  |  |  |
| **Component Code** | **Ingredient Name** |  | **one dose** | **Number of daily doses** | **Number of days to be prepared** |
| 656700420 | Nelson ibuprofen 200 mg (ibuprofen)_(0.2g/1 Tablet) |  | 1 | 1 | 30 |
| 644801990 | Taiguk Dapsone Tablet100mg_(0.1g/1 Tablet) |  | 1 | 1 | 30 |
|  |  |  |  |  |  |
| **Pharmacy** | **[Pharmacist:EUNJU LEE]** |  |  |  | **(Number of days to be prepared : 30 days)** |
| **Billing Code** | **Drug name** | **replaced** | **one dose** | **Number of daily doses** | **Number of days to be prepared** |
|  | Hawon Ibuprofen Tablets 200 mg_(0.2g/1 Tablet) | replaced | 1 | 1 | 30 |
| A08601041 | Taiguk Dapsone Tablet100mg_(0.1g/1 Tablet) |  | 1 | 1 | 30 |
|  |  |  |  |  |  |
| **Precautions** |  |  |  |  |  |
| [Hawon Ibuprofen Tablets 200 mg] - ●Take at regular intervals and do not exceed the doses indicated. | | |  |  |  |
| ●Take it after meals to reduce gastrointestinal disorders. | |  |  |  |  |
| ●If you are uncomfortable with your stomach, take it with food or milk. | |  |  |  |  |
| ●Take it with water exactly as directed and don’t chew on it as it tastes bitter. | |  |  |  |  |
| ●Pay special attention to children and consult a pediatrician or specialist. | |  |  |  |  |
| [Taiguk Dapsone Tablet100mg]-1. Take after meals. | |  |  |  |  |
| 2. Tell your doctor about your current medicines and past and current illnesses. | |  |  |  |  |
| 3. Wear sun products in case of excessive sun exposure. | |  |  |  |  |
| 4. If the rash appears, stop taking the medication and inform your doctor or pharmacist. | |  |  |  |  |

| **doc 1-30**  **Recording records by period_**** Cho_2013-07-19** | |  |  |  |  |
| --- | --- | --- | --- | --- | --- |
|  |  |  |  |  |  |
|  |  |  |  |  | **Visiting Date : [2013-07-19 PM 8:51:30]** |
| **Name** | **** Cho(*/**) |  | **Health insurance subscriber** | **** Cho |  |
| **Resident registration number** | 331209-2****** |  | **Phone number** |  |  |
| **Adress** | **-* *, ** **** ** ******* , , Seoul |  |  |  |  |
| **Engine symbol / Facility symbol / Institution name** | |  |  |  | / / Seoul, Office |
|  |  |  |  |  |  |
| **Grant Number** |  |  | **Doctor** | Eunhee Hong(48110) | |
| **Prescription issuing agency** | Korea Association of Health Promotion’ Clinic |  | **Phone number** |  |  |
| **Disease number** |  |  | **Specific symbol** |  |  |
|  |  |  |  |  |  |
| **Prescription list** |  |  |  |  |  |
| **Component Code** | **Ingredient Name** |  | **one dose** | **Number of daily doses** | **Number of days to be prepared** |
| 656700420 | Nelson ibuprofen 200 mg (ibuprofen)_(0.2g/1 Tablet) |  | 1 | 1 | 30 |
| 644801990 | Taiguk Dapsone Tablet100mg_(0.1g/1 Tablet) |  | 1 | 1 | 30 |
|  |  |  |  |  |  |
| **Pharmacy** | **[Pharmacist:EUNJU LEE]** |  |  |  | **(Number of days to be prepared : 30 days)** |
| **Billing Code** | **Drug name** | **replaced** | **one dose** | **Number of daily doses** | **Number of days to be prepared** |
|  | Hawon Ibuprofen Tablets 200 mg_(0.2g/1 Tablet) | replaced | 1 | 1 | 30 |
| A08601041 | Taiguk Dapsone Tablet100mg_(0.1g/1 Tablet) |  | 1 | 1 | 30 |
|  |  |  |  |  |  |
| **Precautions** |  |  |  |  |  |
| ※ Take 30 minutes after breakfast once a day | |  |  |  |  |
| [Hawon Ibuprofen Tablets 200 mg] - ●Take at regular intervals and do not exceed the doses indicated. | | |  |  |  |
| ●Take it after meals to reduce gastrointestinal disorders. | |  |  |  |  |
| ●If you are uncomfortable with your stomach, take it with food or milk. | |  |  |  |  |
| ●Take it with water exactly as directed and don’t chew on it as it tastes bitter. | |  |  |  |  |
| ●Pay special attention to children and consult a pediatrician or specialist. | |  |  |  |  |
| [Taiguk Dapsone Tablet100mg]-1. Take after meals. | |  |  |  |  |
| 2. Tell your doctor about your current medicines and past and current illnesses. | |  |  |  |  |
| 3. Wear sun products in case of excessive sun exposure. | |  |  |  |  |
| 4. If the rash appears, stop taking the medication and inform your doctor or pharmacist. | |  |  |  |  |

| **doc 1-31**  **Recording records by period_**** Cho_2013-12-21** | |  |  |  |  |
| --- | --- | --- | --- | --- | --- |
|  |  |  |  |  |  |
|  |  |  |  |  | **Visiting Date : [2013-12-21 AM 11:30:19]** |
| **Name** | **** Cho(*/**) |  | **Health insurance subscriber** | **** Cho |  |
| **Resident registration number** | 331209-2****** |  | **Phone number** |  |  |
| **Adress** | **-* *, ** **** ** ******* , , Seoul |  |  |  |  |
| **Engine symbol / Facility symbol / Institution name** | |  |  |  | / / Seoul, Office |
|  |  |  |  |  |  |
| **Grant Number** |  |  | **Doctor** | Eunhee Hong(48110) | |
| **Prescription issuing agency** | Korea Association of Health Promotion’ Clinic |  | **Phone number** |  |  |
| **Disease number** |  |  | **Specific symbol** |  |  |
|  |  |  |  |  |  |
| **Prescription list** |  |  |  |  |  |
| **Component Code** | **Ingredient Name** |  | **one dose** | **Number of daily doses** | **Number of days to be prepared** |
| 644801990 | Taiguk Dapsone Tablet100mg_(0.1g/1 Tablet) |  | 1 | 1 | 30 |
| 656700420 | Nelson ibuprofen 200 mg (ibuprofen)_(0.2g/1 Tablet) |  | 1 | 1 | 30 |
|  |  |  |  |  |  |
| **Pharmacy** | **[Pharmacist:EUNJU LEE]** |  |  |  | **(Number of days to be prepared : 30 days)** |
| **Billing Code** | **Drug name** | **replaced** | **one dose** | **Number of daily doses** | **Number of days to be prepared** |
| A08601041 | Taiguk Dapsone Tablet100mg_(0.1g/1 Tablet) |  | 1 | 1 | 30 |
|  | Hawon Ibuprofen Tablets 200 mg_(0.2g/1 Tablet) | replaced | 1 | 1 | 30 |
|  |  |  |  |  |  |
| **Precautions** |  |  |  |  |  |
| ※ Take once a day | |  |  |  |  |
| [Taiguk Dapsone Tablet100mg]-1. Take after meals. | |  |  |  |  |
| 2. Tell your doctor about your current medicines and past and current illnesses. | |  |  |  |  |
| 3. Wear sun products in case of excessive sun exposure. | |  |  |  |  |
| 4. If the rash appears, stop taking the medication and inform your doctor or pharmacist. | |  |  |  |  |
| [Hawon Ibuprofen Tablets 200 mg] - ●Take at regular intervals and do not exceed the doses indicated. | | |  |  |  |
| ●Take it after meals to reduce gastrointestinal disorders. | |  |  |  |  |
| ●If you are uncomfortable with your stomach, take it with food or milk. | |  |  |  |  |
| ●Take it with water exactly as directed and don’t chew on it as it tastes bitter. | |  |  |  |  |
| ●Pay special attention to children and consult a pediatrician or specialist. | |  |  |  |  |

| **doc 1-32**  **Recording records by period_**** Cho_2014-03-20** | |  |  |  |  |
| --- | --- | --- | --- | --- | --- |
|  |  |  |  |  |  |
|  |  |  |  |  | **Visiting Date : [2014-03-20 PM 6:25:23]** |
| **Name** | **** Cho(*/**) |  | **Health insurance subscriber** | **** Cho |  |
| **Resident registration number** | 331209-2****** |  | **Phone number** |  |  |
| **Adress** | **-* *, ** **** ** ******* , , Seoul |  |  |  |  |
| **Engine symbol / Facility symbol / Institution name** | |  |  |  | / / Seoul, Office |
|  |  |  |  |  |  |
| **Grant Number** |  |  | **Doctor** | Eunhee Hong(48110) | |
| **Prescription issuing agency** | Korea Association of Health Promotion’ Clinic |  | **Phone number** |  |  |
| **Disease number** |  |  | **Specific symbol** |  |  |
|  |  |  |  |  |  |
| **Prescription list** |  |  |  |  |  |
| **Component Code** | **Ingredient Name** |  | **one dose** | **Number of daily doses** | **Number of days to be prepared** |
| 644801990 | Taiguk Dapsone Tablet100mg_(0.1g/1 Tablet) |  | 1 | 1 | 90 |
| 656700420 | Nelson ibuprofen 200 mg (ibuprofen)_(0.2g/1 Tablet) |  | 1 | 1 | 90 |
|  |  |  |  |  |  |
| **Pharmacy** | **[Pharmacist:EUNJU LEE]** |  |  |  | **(Number of days to be prepared : 90 일)** |
| **Billing Code** | **Drug name** | **replaced** | **one dose** | **Number of daily doses** | **Number of days to be prepared** |
| A08601041 | Taiguk Dapsone Tablet100mg_(0.1g/1 Tablet) |  | 1 | 1 | 90 |
| A18400091 | Nelson ibuprofen 200 mg (ibuprofen)_(0.2g/1 Tablet) |  | 1 | 1 | 90 |
|  |  |  |  |  |  |
| **Precautions** |  |  |  |  |  |
| ※ Take once a day | |  |  |  |  |
| [Taiguk Dapsone Tablet100mg]-1. Take after meals. | |  |  |  |  |
| 2. Tell your doctor about your current medicines and past and current illnesses. | |  |  |  |  |
| 3. Wear sun products in case of excessive sun exposure. | |  |  |  |  |
| 4. If the rash appears, stop taking the medication and inform your doctor or pharmacist. | |  |  |  |  |
| [Nelson ibuprofen 200 mg (Ibuprofen)] - ●Take at regular intervals and do not exceed the doses indicated. | | | | |  |
| ●Take it after meals to reduce gastrointestinal disorders. | |  |  |  |  |
| ●If you are uncomfortable with your stomach, take it with food or milk. | |  |  |  |  |
| ●Take it with water exactly as directed and don’t chew on it as it tastes bitter. | |  |  |  |  |
| ●Pay special attention to children and consult a pediatrician or specialist. | |  |  |  |  |

| **doc 1-33**  **Recording records by period_**** Cho_2014-11-15** | |  |  |  |  |
| --- | --- | --- | --- | --- | --- |
|  |  |  |  |  |  |
|  |  |  |  |  | **Visiting Date : [2014-11-15 PM 4:39:15]** |
| **Name** | **** Cho(*/**) |  | **Health insurance subscriber** | **** Cho |  |
| **Resident registration number** | 331209-2****** |  | **Phone number** |  |  |
| **Adress** | **-* *, ** **** ** ******* , , Seoul |  |  |  |  |
| **Engine symbol / Facility symbol / Institution name** | |  |  |  | / / Seoul, Office |
|  |  |  |  |  |  |
| **Grant Number** |  |  | **Doctor** | Eunhee Hong(48110) | |
| **Prescription issuing agency** | Korea Association of Health Promotion’ Clinic |  | **Phone number** |  |  |
| **Disease number** | i109 |  | **Specific symbol** |  |  |
|  |  |  |  |  |  |
| **Prescription list** |  |  |  |  |  |
| **Component Code** | **Ingredient Name** |  | **one dose** | **Number of daily doses** | **Number of days to be prepared** |
| 644801990 | Taiguk Dapsone Tablet100mg_(0.1g/1 Tablet) |  | 1 | 1 | 60 |
| 656700420 | Nelson ibuprofen 200 mg (ibuprofen)_(0.2g/1 Tablet) |  | 1 | 1 | 60 |
| 648900030 | Novask tablet 5 milligrams (amlodipine besylate)_(6.944mg/1 Tablet) |  | 1 | 1 | 60 |
|  |  |  |  |  |  |
| **Pharmacy** | **[Pharmacist:EUNJU LEE]** |  |  |  | **(Number of days to be prepared : 60 days)** |
| **Billing Code** | **Drug name** | **replaced** | **one dose** | **Number of daily doses** | **Number of days to be prepared** |
| A08601041 | Taiguk Dapsone Tablet100mg_(0.1g/1 Tablet) |  | 1 | 1 | 60 |
| A18400091 | Nelson ibuprofen 200 mg (ibuprofen)_(0.2g/1 Tablet) |  | 1 | 1 | 60 |
| E01890381 | Novask tablet 5 milligrams (amlodipine besylate)_(6.944mg/1 Tablet) |  | 1 | 1 | 60 |
|  |  |  |  |  |  |
| **Precautions** |  |  |  |  |  |
| ※ Take once a day | |  |  |  |  |

| **doc 1-34**  **Recording records by period_**** Cho_2015-03-02** | |  |  |  |  |
| --- | --- | --- | --- | --- | --- |
|  |  |  |  |  |  |
|  |  |  |  |  | **Visiting Date : [2015-03-02 PM 7:37:23]** |
| **Name** | **** Cho(*/**) |  | **Health insurance subscriber** | **** Cho |  |
| **Resident registration number** | 331209-2****** |  | **Phone number** |  |  |
| **Adress** | **-* *, ** **** ** ******* , , Seoul |  |  |  |  |
| **Engine symbol / Facility symbol / Institution name** | |  |  |  | / / Seoul, Office |
|  |  |  |  |  |  |
| **Grant Number** |  |  | **Doctor** | Eunhee Hong(48110) | |
| **Prescription issuing agency** | Korea Association of Health Promotion’ Clinic |  | **Phone number** |  |  |
| **Disease number** | I109 |  | **Specific symbol** |  |  |
|  |  |  |  |  |  |
| **Prescription list** |  |  |  |  |  |
| **Component Code** | **Ingredient Name** |  | **one dose** | **Number of daily doses** | **Number of days to be prepared** |
| 644801990 | Taiguk Dapsone Tablet100mg_(0.1g/1 Tablet) |  | 1 | 1 | 60 |
| 656700420 | Nelson ibuprofen 200 mg (ibuprofen)_(0.2g/1 Tablet) |  | 1 | 1 | 60 |
| 648900030 | Novask tablet 5 milligrams (amlodipine besylate)_(6.944mg/1 Tablet) |  | 1 | 1 | 60 |
|  |  |  |  |  |  |
| **Pharmacy** | **[Pharmacist:EUNJU LEE]** |  |  |  | **(Number of days to be prepared : 60 days)** |
| **Billing Code** | **Drug name** | **replaced** | **one dose** | **Number of daily doses** | **Number of days to be prepared** |
| A08601041 | Taiguk Dapsone Tablet100mg_(0.1g/1 Tablet) |  | 1 | 1 | 60 |
| A18400091 | Nelson ibuprofen 200 mg (ibuprofen)_(0.2g/1 Tablet) |  | 1 | 1 | 60 |
| E01890381 | Novask tablet 5 milligrams (amlodipine besylate)_(6.944mg/1 Tablet) |  | 1 | 1 | 60 |
|  |  |  |  |  |  |
| **Precautions** |  |  |  |  |  |
| ※ Take once a day | |  |  |  |  |
